# Supplementary material for: Porous Fe3O4 hollow spheres with chlorine-doped-carbon coating as superior anode materials for lithium ion batteries
Source: Royal Society of Chemistry journal article supplement (doi:10.1039/c5ra09915c), 2015-01-01
Supplement: c5ra09915c1.pdf [file c5ra09915c1.pdf]

## Porous Fe<sub>3</sub>O<sub>4</sub> hollow spheres with chlorine-doped-carbon coating as superior anode materials for lithium ion batteries

Hongbo Geng,<sup>a,b</sup> Shuangshuang Li,<sup>a,b</sup> Yue Pan,<sup>a</sup> Yonggang Yang,<sup>a</sup> Junwei Zheng,<sup>a,b</sup> Hongwei Gu<sup>\*a</sup>

<sup>a</sup>Key Laboratory of Organic Synthesis of Jiangsu Province, College of Chemistry, Chemical Engineering and Materials Science & Collaborative Innovation Center of Suzhou Nano Science and Technology, Soochow University, Suzhou, 215123, China

<sup>b</sup>College of Physics, Optoelectronics and Energy, Soochow University, Suzhou, 215006, China

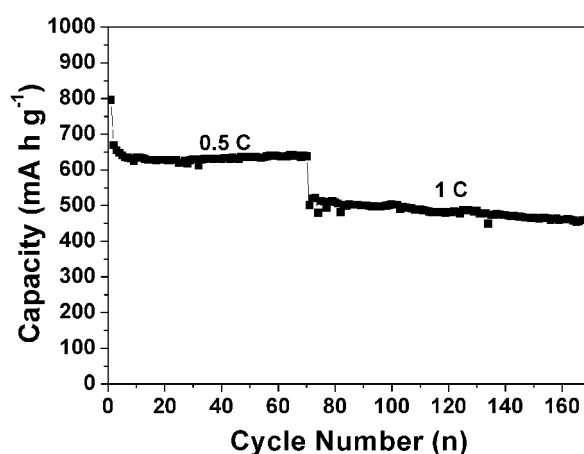

Figure S1. The long-term cycling performance of the PH-Fe<sub>3</sub>O<sub>4</sub>@C/Cl.

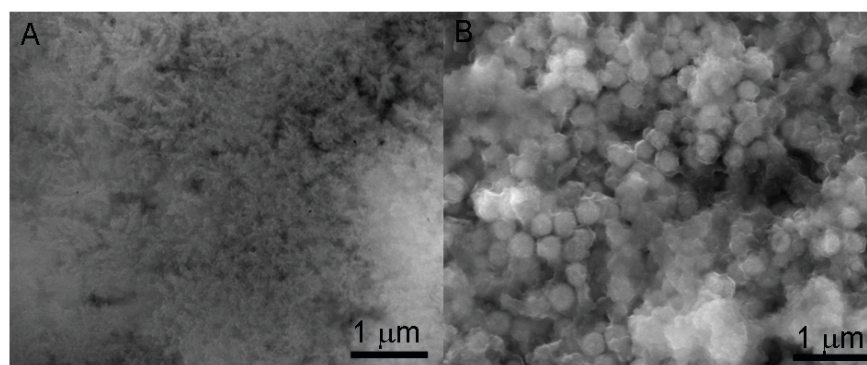

Figure S2. The SEM images of PH-Fe<sub>3</sub>O<sub>4</sub> (A) and PH-Fe<sub>3</sub>O<sub>4</sub>@C/Cl (B) spheres after 30 cycles at 0.1 C.
